# Supplementary material
Source: ML conference proceedings conference paper supplement (https://openaccess.thecvf.com/content/CVPR2024/html/Lv_PLACE_Adaptive_Layout-Semantic_CVPR_2024_paper.html)
Supplement: Supplementary file 1 [file Lv_PLACE_Adaptive_Layout-Semantic_CVPR_2024_supplemental.pdf]

## Supplementary Material

Fig. D presents the results of the model fine-tuned with and without Semantic Alignment loss. The 2nd and 4th columns respectively show the self-attention maps of models fine-tuned without and with SA loss. It can be observed that the SA loss facilitates the interaction of image tokens

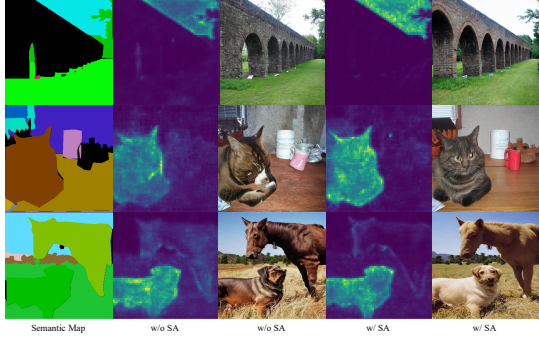

Figure D. More Qualitative Comparisons on SA Loss. The 2<sup>nd</sup> and 4<sup>th</sup> show the self-attention map for part of semantics.

within the same or related semantic regions (e.g. 'sky', 'cat', and 'dog'), thereby improving the layout consistency and visual quality of synthesized images.

#### B.4. Layout Free Prior Preservation loss

In this section, we first present more ablation qualitative comparison results (new object synthesis) on the Layout Free Prior Preservation loss in Fig. E. Additionally, we validate the effectiveness of our layout-free prior preservation loss by assessing the original text-to-image synthesis capability of different models, as shown in Table A and Fig. F.

Firstly, as observed from Fig. E, the utilization of LFP Loss results in enhanced visual quality in the synthesis of semantic images. Notably, 'cat' in the 2<sup>nd</sup> row, 'sheep' in the 3<sup>rd</sup> row, and 'laptop' in the 6<sup>th</sup> row, all demonstrate improved visual results. Additionally, the semantic consistency of the results has been elevated, as shown in the 4<sup>th</sup> row with 'fog' and the 5<sup>th</sup> row with 'clouds'. These results collectively substantiate the effectiveness of the LFP Loss.

Then we assessed the original text-to-image synthesis capabilities of four models: Original Stable Diffusion V1-4 (SD V1-4), FreestyleNet, our model without using LFP (Ours w/o LFP), and our model with LFP (Ours w/ LFP). In this case, both our models and FreestyleNet were fine-tuned on the ADE20K dataset using SD V1-4 as the initial parameters. We extract 1500 captions as input text prompts from the validation set of COCO-Stuff. During sampling, we employ 50 PLMS sampling steps with a classifier-free guidance scale of 2. We calculate the FID and Text-Alignment scores between the synthesized images and ground truth, as shown in Table A. It can be observed that the adoption of the LFP Loss significantly preserves the original text-to-image synthesis capability of the fine-tuned model. The FID decreases from 46.2 to 36.8, and Text-Alignment increases from 0.27 to 0.30, approaching the performance of the original model. This indicates the important role of LFP loss in preserving semantic concepts in the original model. Furthermore, the qualitative comparisons in Fig. F also indicate our LFP Loss helps preserve priors in the original model, resulting in the synthesis of images with improved semantic consistency and visual quality.

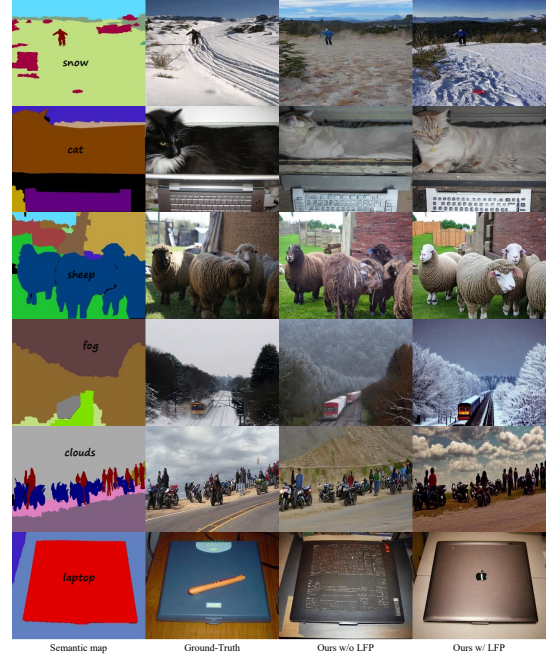

Figure E. More Qualitative Ablation Comparisons on LFP Loss.

| Method       | FID↓        | Text-Alignment ↑ |
|--------------|-------------|------------------|
| SD V1-4      | <b>34.4</b> | <b>0.31</b>      |
| FreestyleNet | 47.4        | 0.27             |
| Ours w/o LFP | 46.2        | 0.27             |
| Ours w/ LFP  | <u>36.8</u> | <u>0.30</u>      |

Table A. Quantitative comparison of Text-to-Image Synthesis.

### C. More Qualitative Results

#### C.1. Additional Details of OOD Evaluation

For quantitative evaluation of Out-Of-Distribution(OOD) synthesis, we conduct experiments from three aspects: new object, new attribute, and new style. We assess the generalization capability of the model fine-tuned on ADE20K. For new object synthesis, we utilize the model to synthesize 5000 images in the validation set of COCO-Stuff. We compute the FID score of synthesized images and the mIoU of semantic classes exclusive to COCO-Stuff. For new attribute synthesis, a total of 260 images are synthesized for six attributes: "brick wall", "sky with rainbow", "autumn flora/tree/grass", "wooden floor", "snowy road", and "colorful carpet". The text alignment between images and text prompts is computed with CLIP. For new style synthesis, a total of 260 images are synthesized across eight different styles: "drawn by Van Gogh", "in oil painting", "in Minecraft", "full of graffiti", "in sketch", "in Monet style", "in anime" and "drawn by Picasso." The text alignment between images and text prompts is assessed by CLIP. Additionally, the semantic layouts used for evaluating new attribute and new style are both sampled from the ADE20K.

*A grey clock tower above building with sky in the background.*

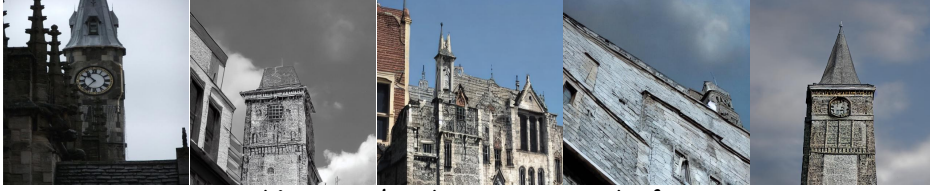

*A white meta bench next to a patch of grass.*

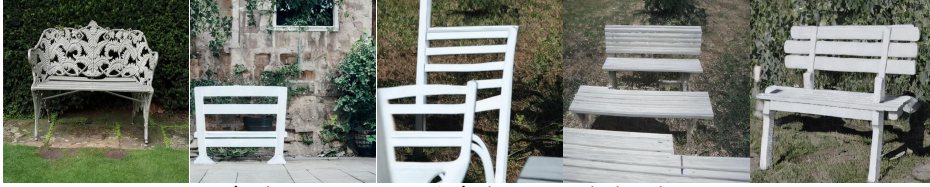

*A bedroom suite with balcony and lovely view.*

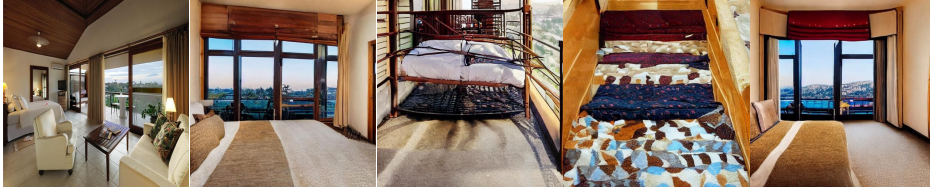

*A man standing next to train tracks with bags of luggage.*

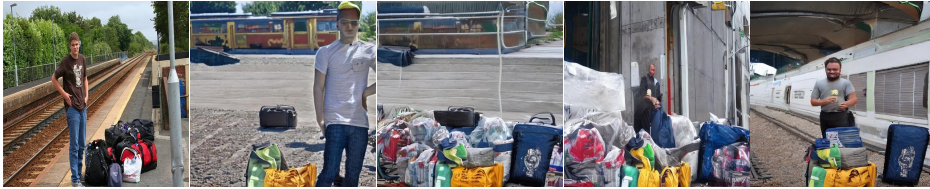

*A teddy bear sits by a keyboards and microphone.*

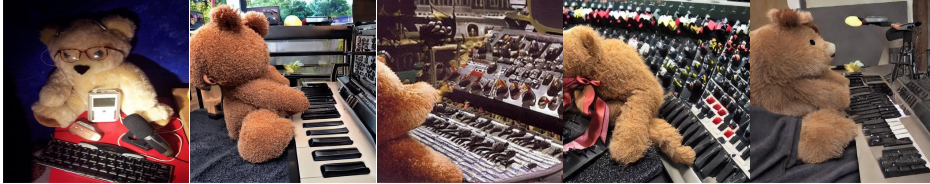

Ground-Truth

SD V1-4

FreestyleNet

Ours w/o LFP

Ours w/ LFP

Figure F. Comparison of Original Text-to-Image Synthesis results across different models.

## C.2. Out-of-distribution Synthesis.

We show more visual comparisons with the competing methods on out-of-distribution synthesis. Fig. G, Fig. H and Fig. I respectively present the qualitative comparisons of the new object, new attribute, and new style, which are synthesized by a model fine-tuned on the ADE20K dataset. It can be observed that our approach synthesizes results that are more consistent with the provided text input.

## C.3. In-distribution Synthesis.

Fig. J and Fig. K respectively illustrate more in-distribution qualitative comparisons on the ADE20K and COCO-Stuff dataset. It can be seen that our synthesized images are not only of high fidelity but also exhibit a strong alignment with the provided semantic layout in terms of finer details.

## D. Limitation

Although PLACE has made advancements in visual quality, semantic consistency, and layout alignment, there are still some limitations. Firstly, the inference speed of diffusion-based methods is still slower compared to that of GAN-based methods. On a V100 GPU, ControlNet, FreestyleNet, and PLACE require an average of approximately 7.5 seconds (s), 5.9 s, and 6.1 s, respectively, to synthesize an image using PLMS sampling for 50 steps. We believe that with the development of superior samplers and latent consistency models, this issue will be largely alleviated. Additionally, constrained by the capabilities of the pre-trained stable diffusion, when prompts for a single class are too long or contain uncommon tokens, the synthesized image may be inconsistent with the given text. Higher-performance text-to-image models may potentially ameliorate this issue.

*bird*

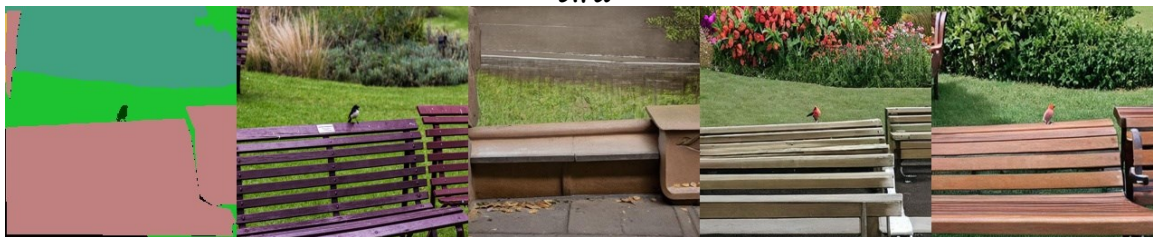

*cell phone*

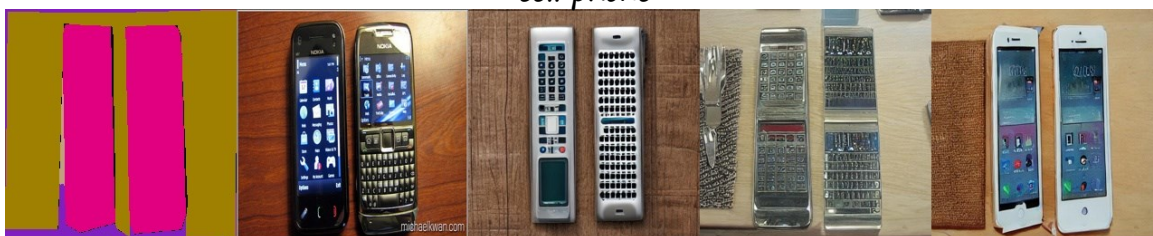

*giraffe*

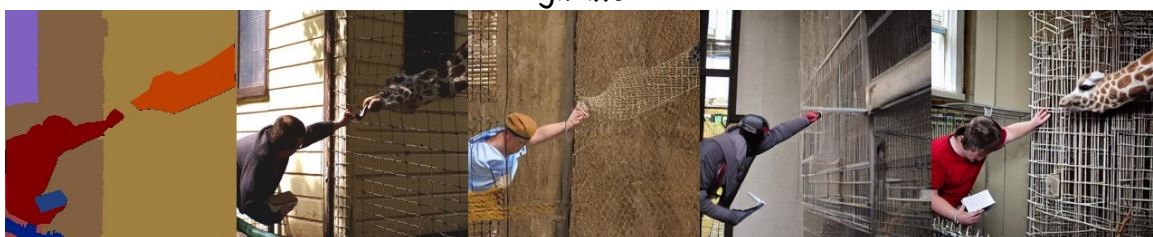

*sheep*

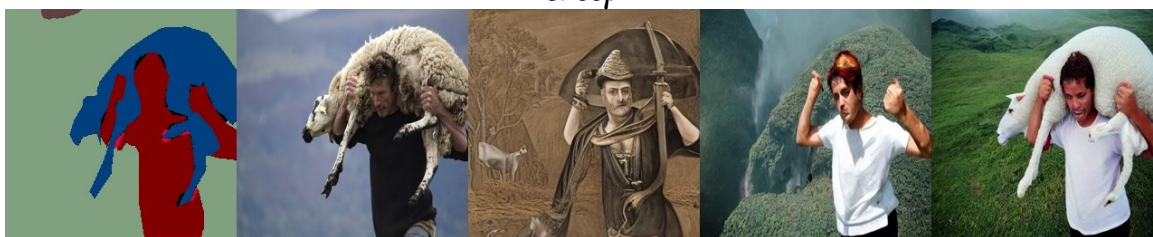

*umbrella*

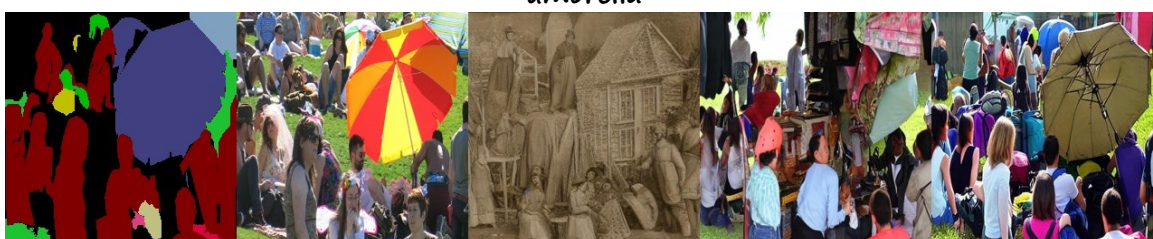

*horse*

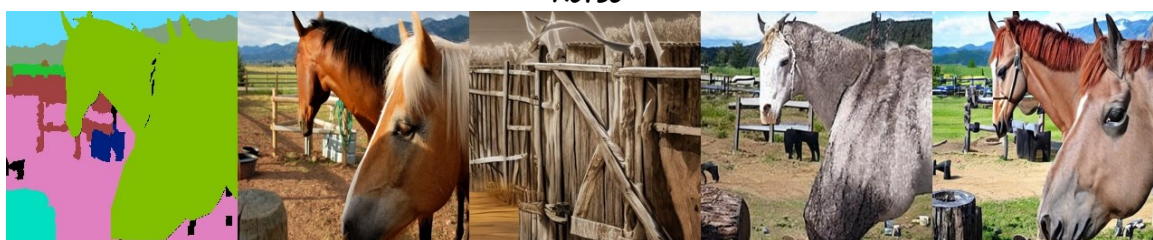

Semantic map

Real image

ControlNet

FreestyleNet

Ours

Figure G. Visual comparisons on new object synthesis.

sky with rainbow

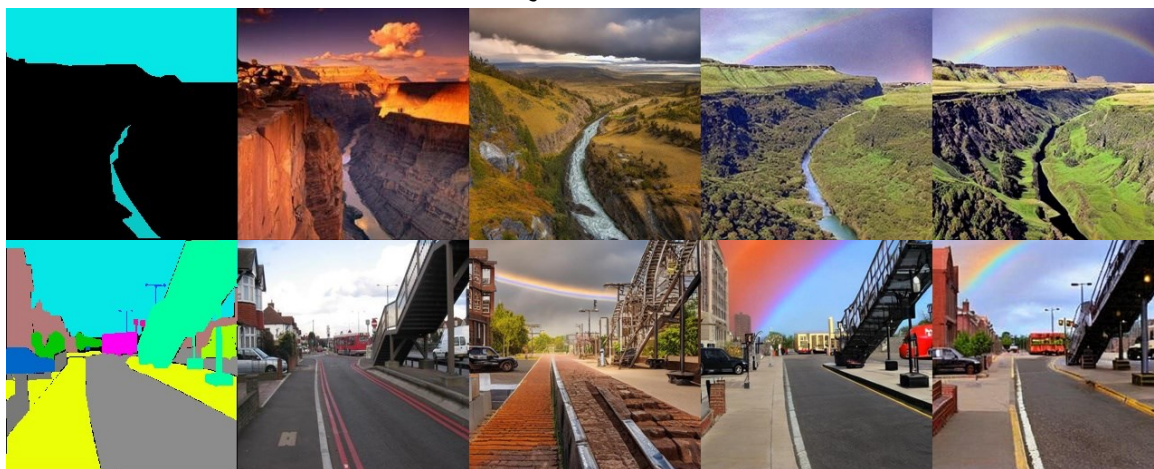

brick wall

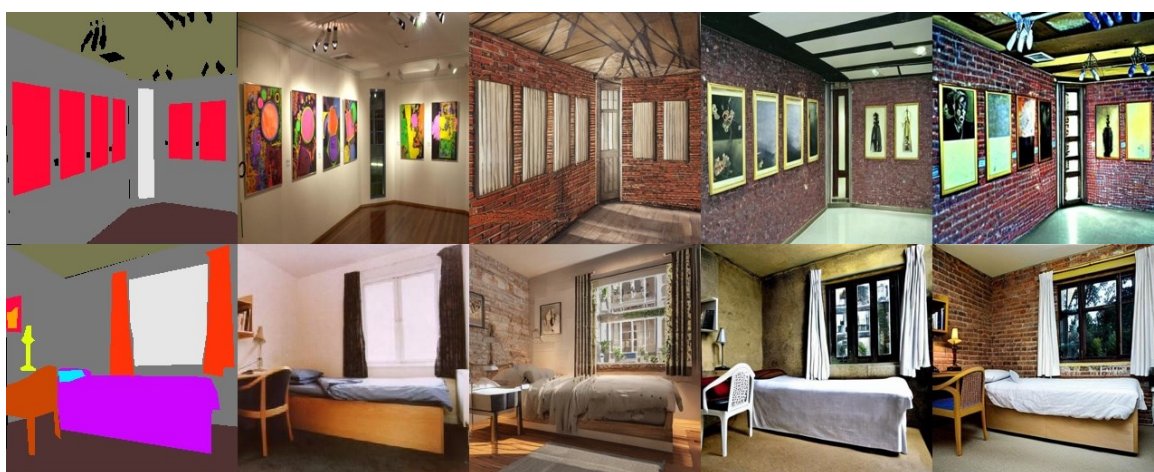

autumn tree, autumn flora

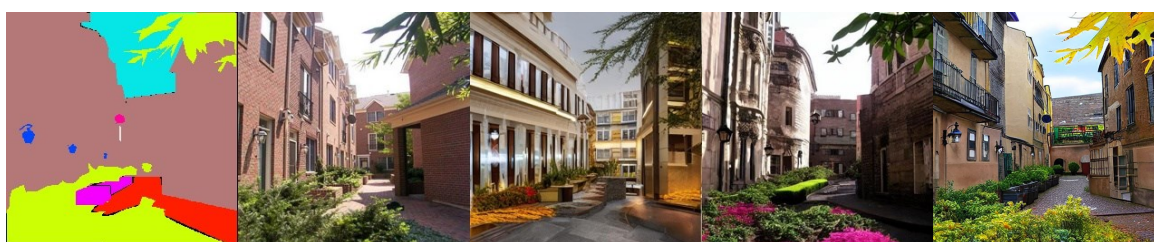

autumn tree, autumn grass

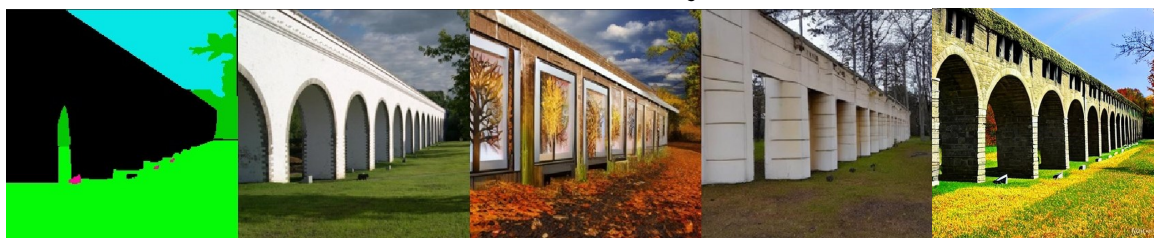

Semantic map

Real image

ControlNet

FreestyleNet

Ours

Figure H. Visual comparisons on new attribute synthesis.

*drawn by Van Gogh*

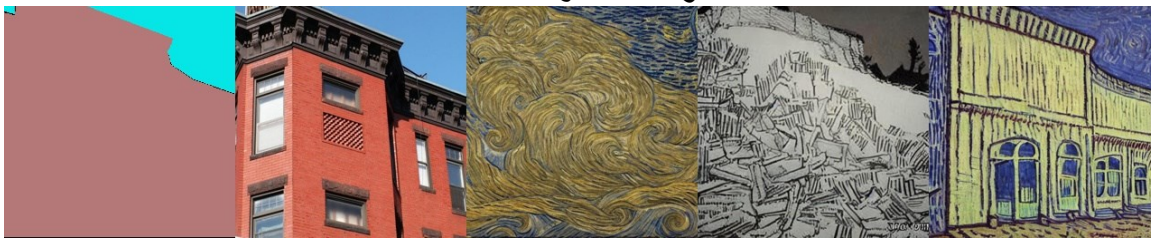

*in oil painting*

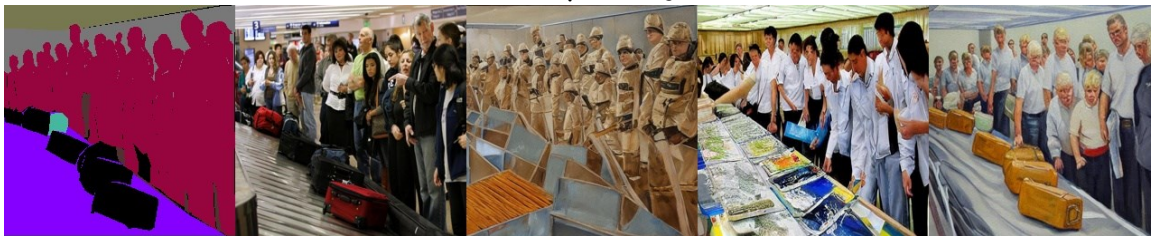

*in Minecraft*

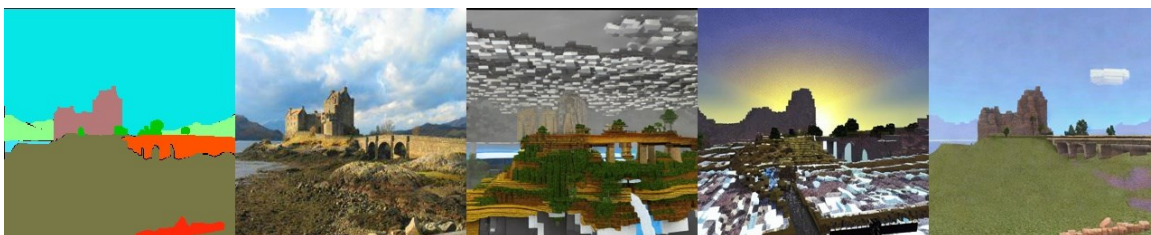

*full of graffiti*

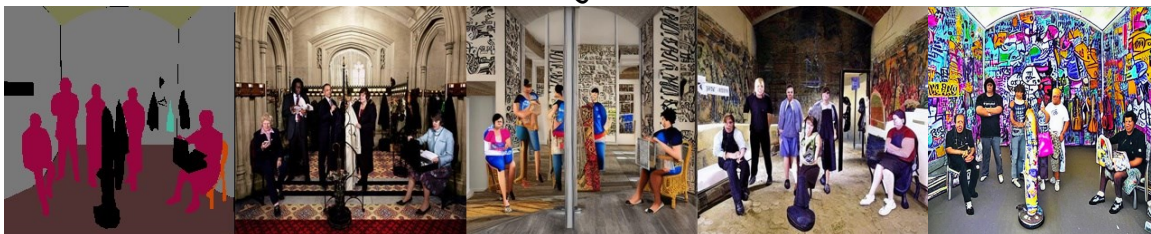

*in sketch*

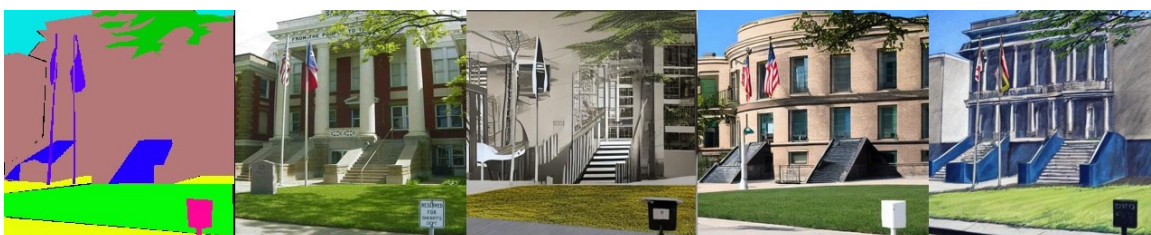

*in Monet style*

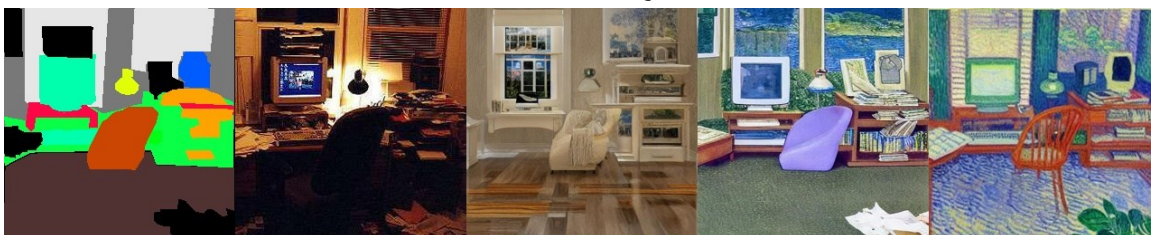

Semantic map

Real image

ControlNet

FreestyleNet

Ours

Figure I. Visual comparisons on new style synthesis.

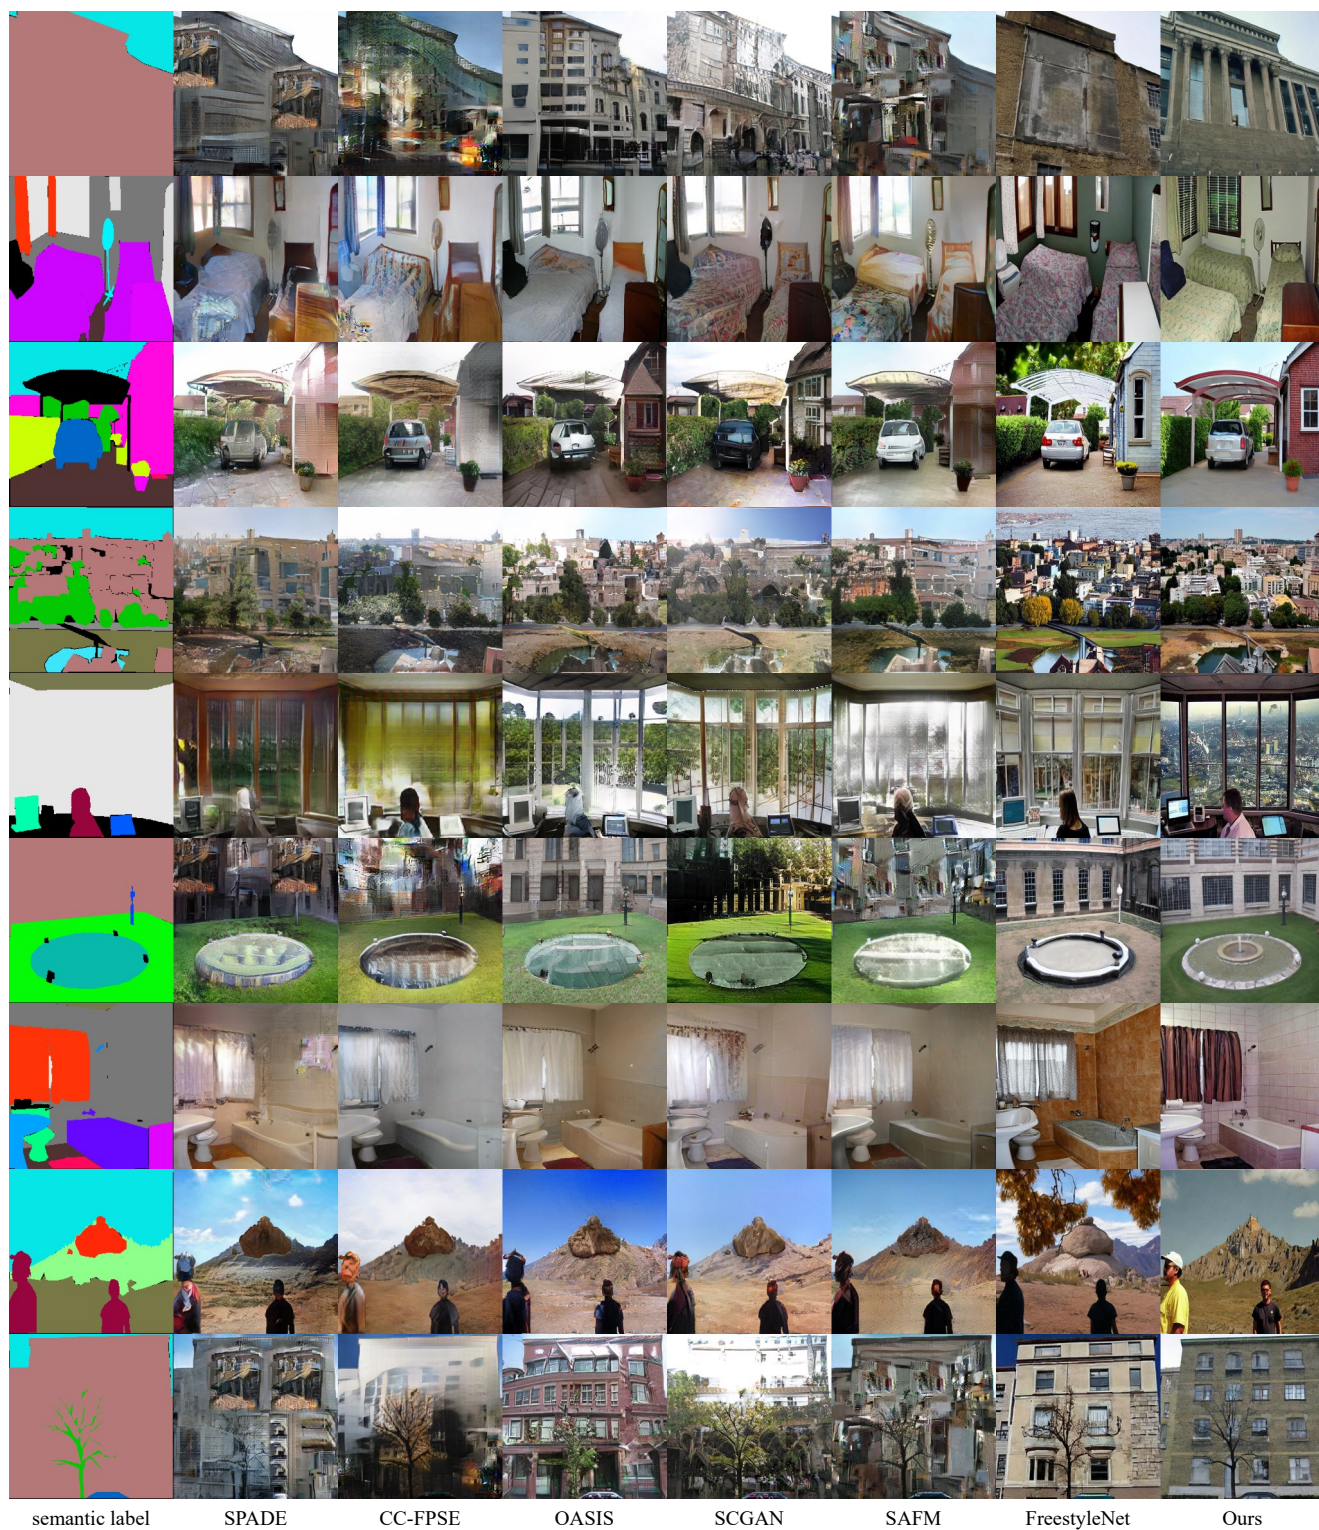

Figure J. Visual comparisons on ADE20K dataset.

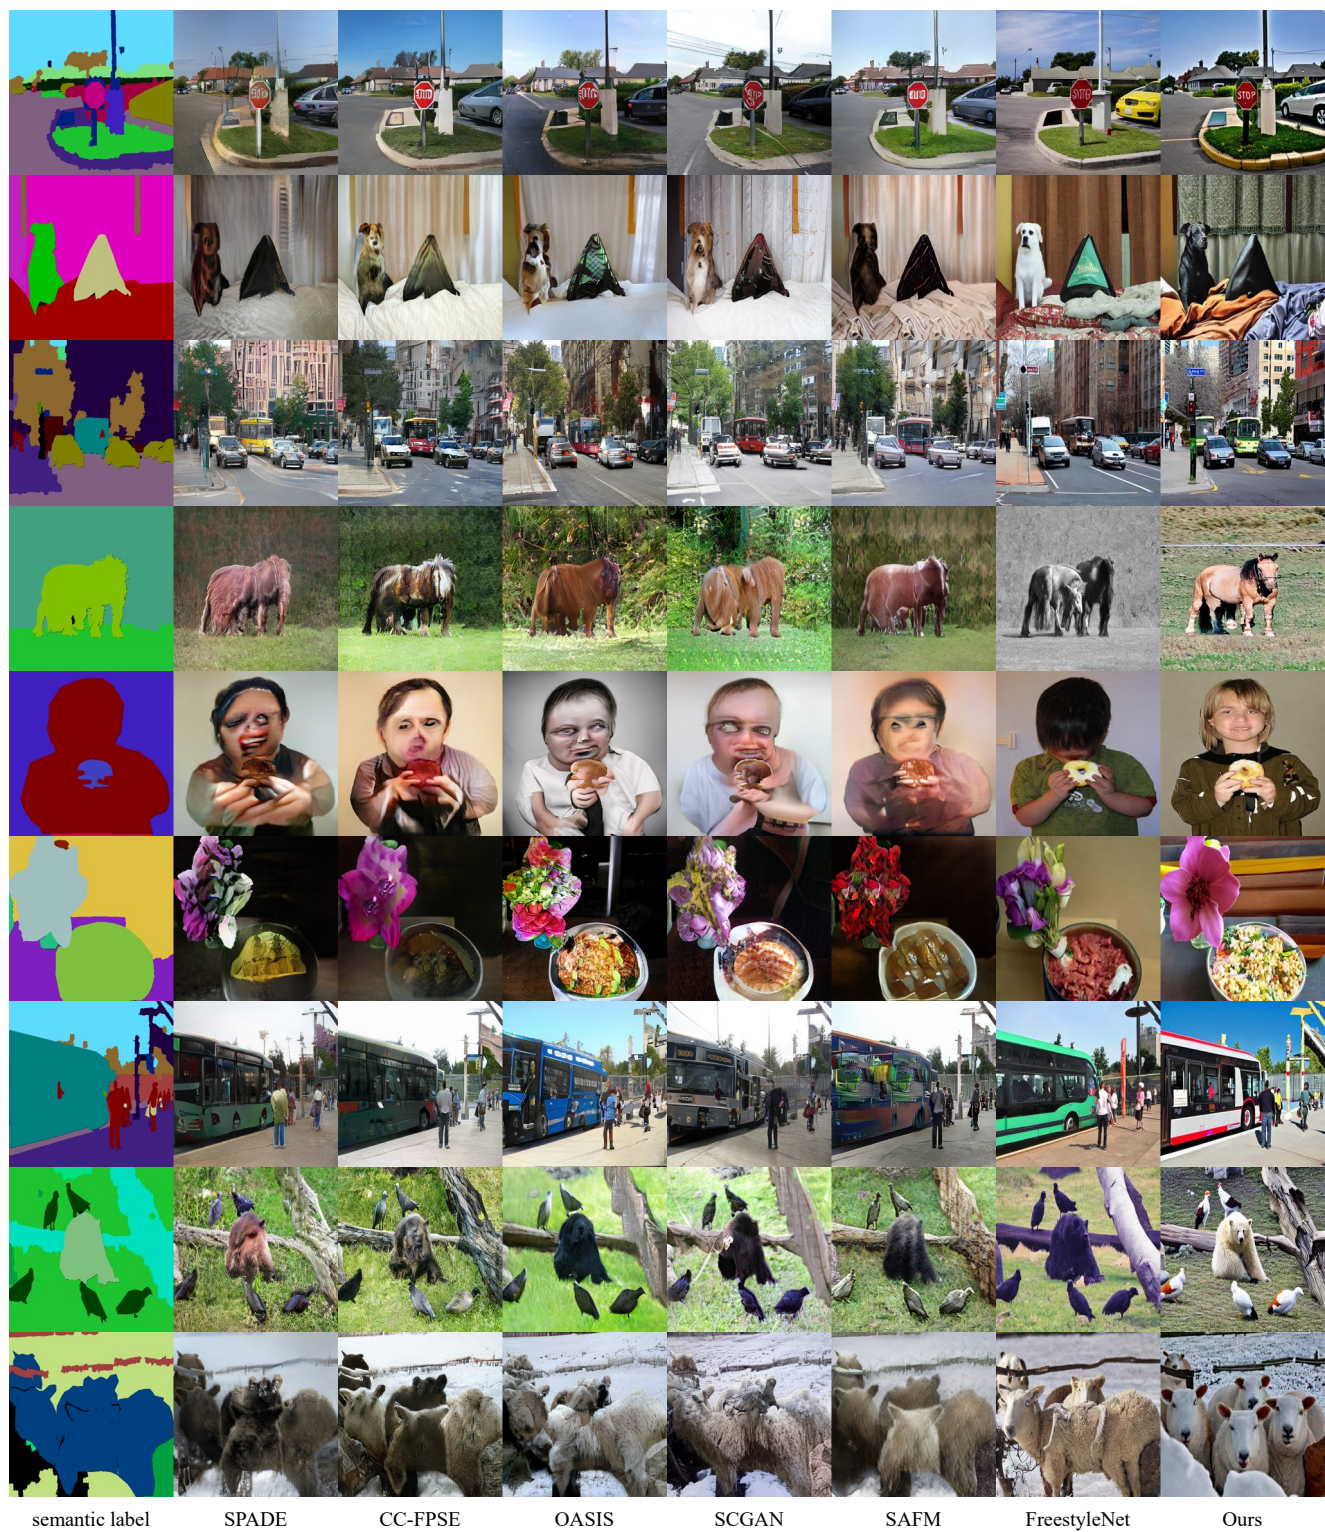

Figure K. Visual comparisons on COCO-Stuff dataset.
